# Supplementary material
Source: PubMed Central journal article supplement (PMC3662375)
Supplement: Supp_Fig3.pdf [file Supp_Fig3.pdf]

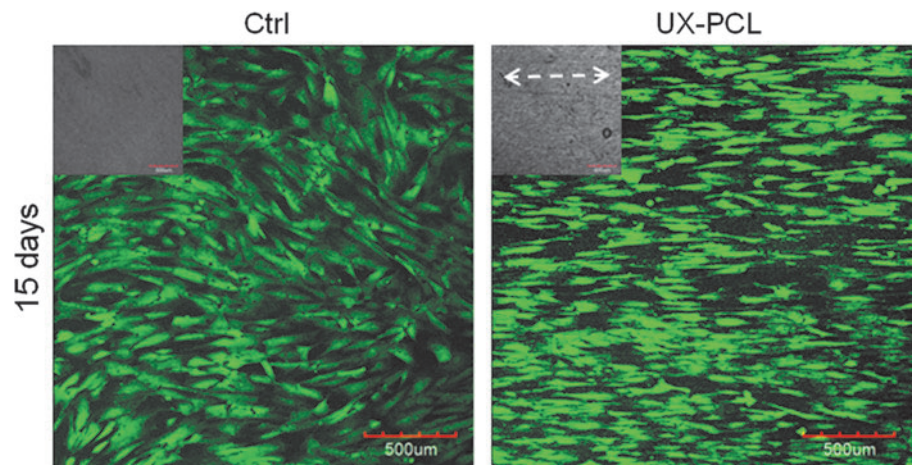

**SUPPLEMENTARY FIG. S3.** hMSC organization in a long-term period. Cells were cultured on HP- (control) and UX-PCL for 15 days and stained by fluorescein-diacetate (FDA)/propidium iodide (PI) (Insets: HP- and UX-PCL; FDA: green, live cells; PI: red, dead cells; scale bar=500  $\mu$ m). hMSCs aligned along the ridges on UX-PCL, but organized randomly in the control group even after achieving confluence.
